# Supplementary material for: Beyond 1100delC: Distinct CHEK2 Variants and Unique Cancer Phenotypes in Northeast Brazil
Source: Research Square preprint supplement (doi:10.21203/rs.3.rs-7653623/v1), 2025-10-10

**Supplementary Material**

Beyond 1100delC: Distinct *CHEK2* Variants and Unique Cancer Phenotypes in Northeast Brazil

Mariana Macambira Noronha, Pedro Robson Costa Passos, Valbert Oliveira Costa Filho, Thais Baccili Cury Megid, Fernanda Teresa de Lima, Danielle Calheiros Campelo Maia

**Summary**

**Figure S1:** Flowchart summarizing the cohort included in the study…………………………….2

**Figure S2:** Geographical distribution of families with the *CHEK2* variant in the State of Ceará.. 3

**Figure 1.** Flowchart summarizing the cohort included in the study.

**
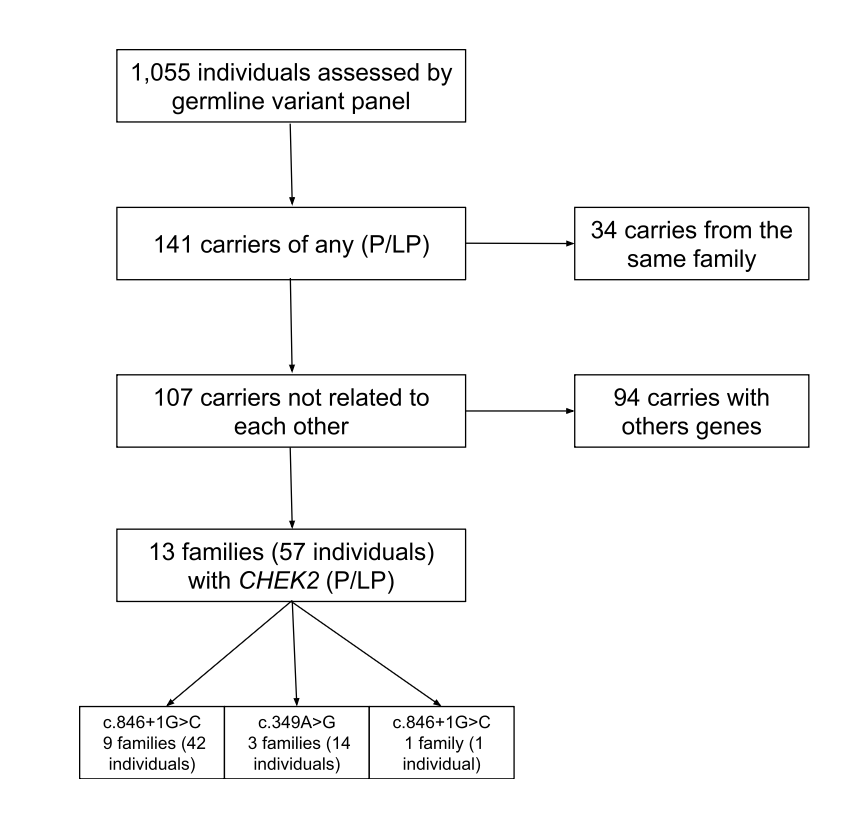
**

**Figure 2.** Geographical distribution of families with the *CHEK2* variant in the State of Ceará


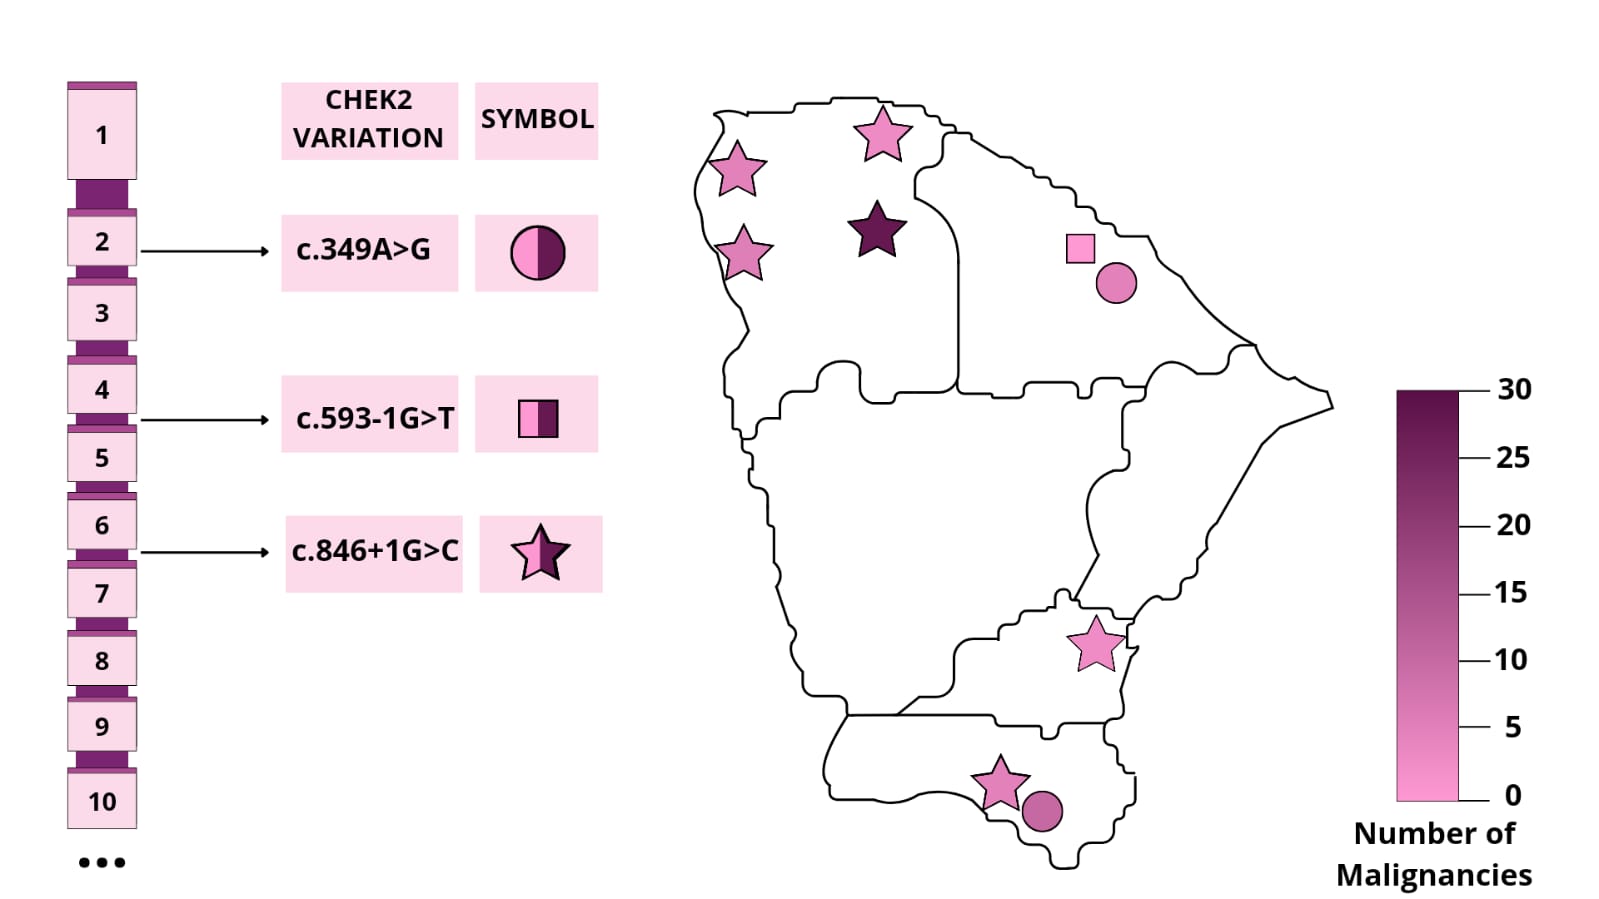

Supplement: Supplementary file 1 [file 220c59bdbb5709df0ad1e428.docx]
